# Supplementary material for: Patients’ experiences of deep brain stimulation for Parkinson's disease: a qualitative systematic review and synthesis
Source: PubMed Central journal article supplement — BMJ Open. 2016 Jun 23;6(6):e011525. doi: 10.1136/bmjopen-2016-011525 (PMC4932278; doi:10.1136/bmjopen-2016-011525), 2016-06-23
Supplement: bmjopen-2016-011525supp_appendix.pdf [file bmjopen-2016-011525supp_appendix.pdf]

Database: Ovid MEDLINE(R) <1946 to February Week 4 2015>

Search Strategy:

---

- 1 exp parkinsonian disorders/ or parkinson disease/
- 2 (parkinson\* adj2 (disease\$ or disorder\$ or syndrome\$)).ti,ab.
- 3 PD.ti,ab.
- 4 or/1-3
- 5 coping strateg\$.ti,ab.
- 6 self-awareness.ti,ab.
- 7 anosognosia.ti,ab.
- 8 ((patient\$ or carer\$ or care or caring or caregiver\$ or healthcare or nurse\$ or consultant\$ or doctor\$ or physician\$ or spouse or partner\$ or wife or wives or husband\$ or family or families or relative\$ or sibling\$) adj4 (experience\$ or awareness or insight or perspective\$ or perception\$ or view\$ or well-being or wellbeing)).ti,ab
- 9 or/5-8
- 10 4 and 9
- 11 exp "Quality of Life"/
- 12 qualitative research/
- 13 or/11-12
- 14 or/1-2
- 15 13 and 14
- 16 10 or 15
- 17 limit 16 to "qualitative (best balance of sensitivity and specificity)"
